# Supplementary material for: Classical non-homologous end-joining pathway utilizes nascent RNA for error-free double-strand break repair of transcribed genes
Source: PubMed Central journal article supplement (PMC5059474; doi:10.1038/ncomms13049), 2016-10-05
Supplement: ncomms13049-s1.pdf [file ncomms13049-s1.pdf]

# Supplementary Figure 1

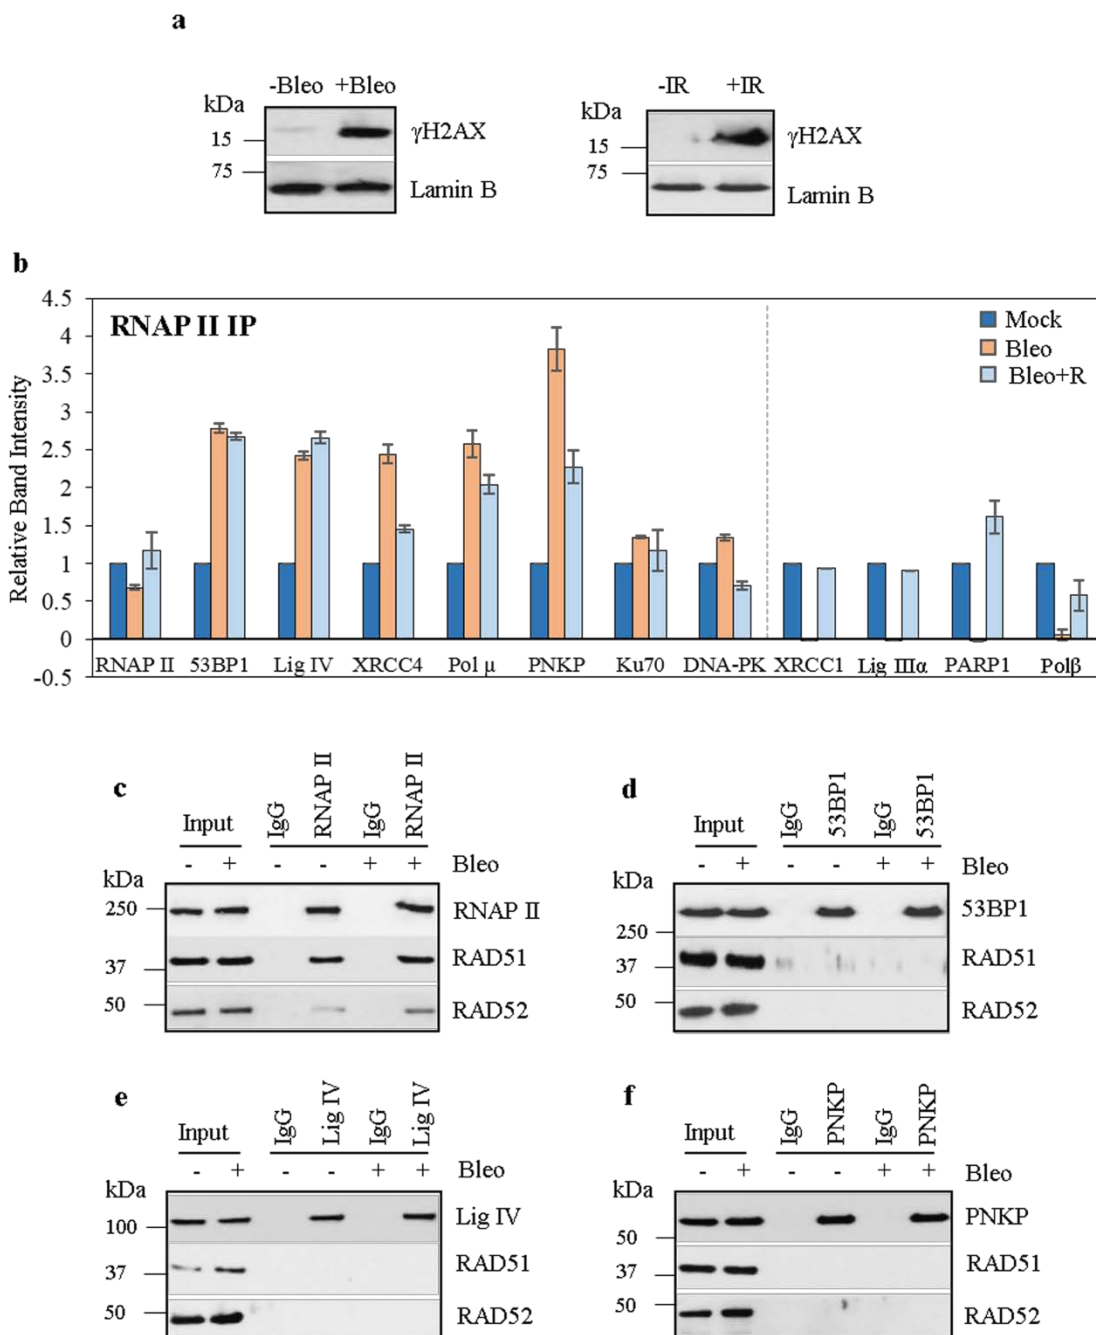

Supplementary Figure 1: Characterization of DSB repair complexes by co-IP analysis

**(a)** Western blot analysis to estimate the level of  $\gamma$ H2AX (phosphorylated form) in NE from mock/Bleo-treated (left panel) and mock/IR-exposed (right panel) HEK293 cells. Lamin B was used as a loading control in each case. **(b)** The intensities of the IP'd protein bands were estimated from three independent experiments from separate batches of cells for Figure 1a. Error bars represent  $\pm$  SD of the mean. NE (benzonase-treated) from HEK293 cells [either mock (-) or Bleo (+) treated] were IP'd with **(c)** anti-RNAP II (pSer2, H5 Ab); **(d)** anti-53BP1; **(e)** anti-Lig IV; **(f)** anti-PNKP antibodies (Abs, even lanes) or control IgG (odd lanes) and tested for the presence of associated proteins with specific Abs as indicated to the right of each row. Each experiment was repeated at least three times with separate batches of cells, and one representative figure is shown in each case.

## Supplementary Figure 2

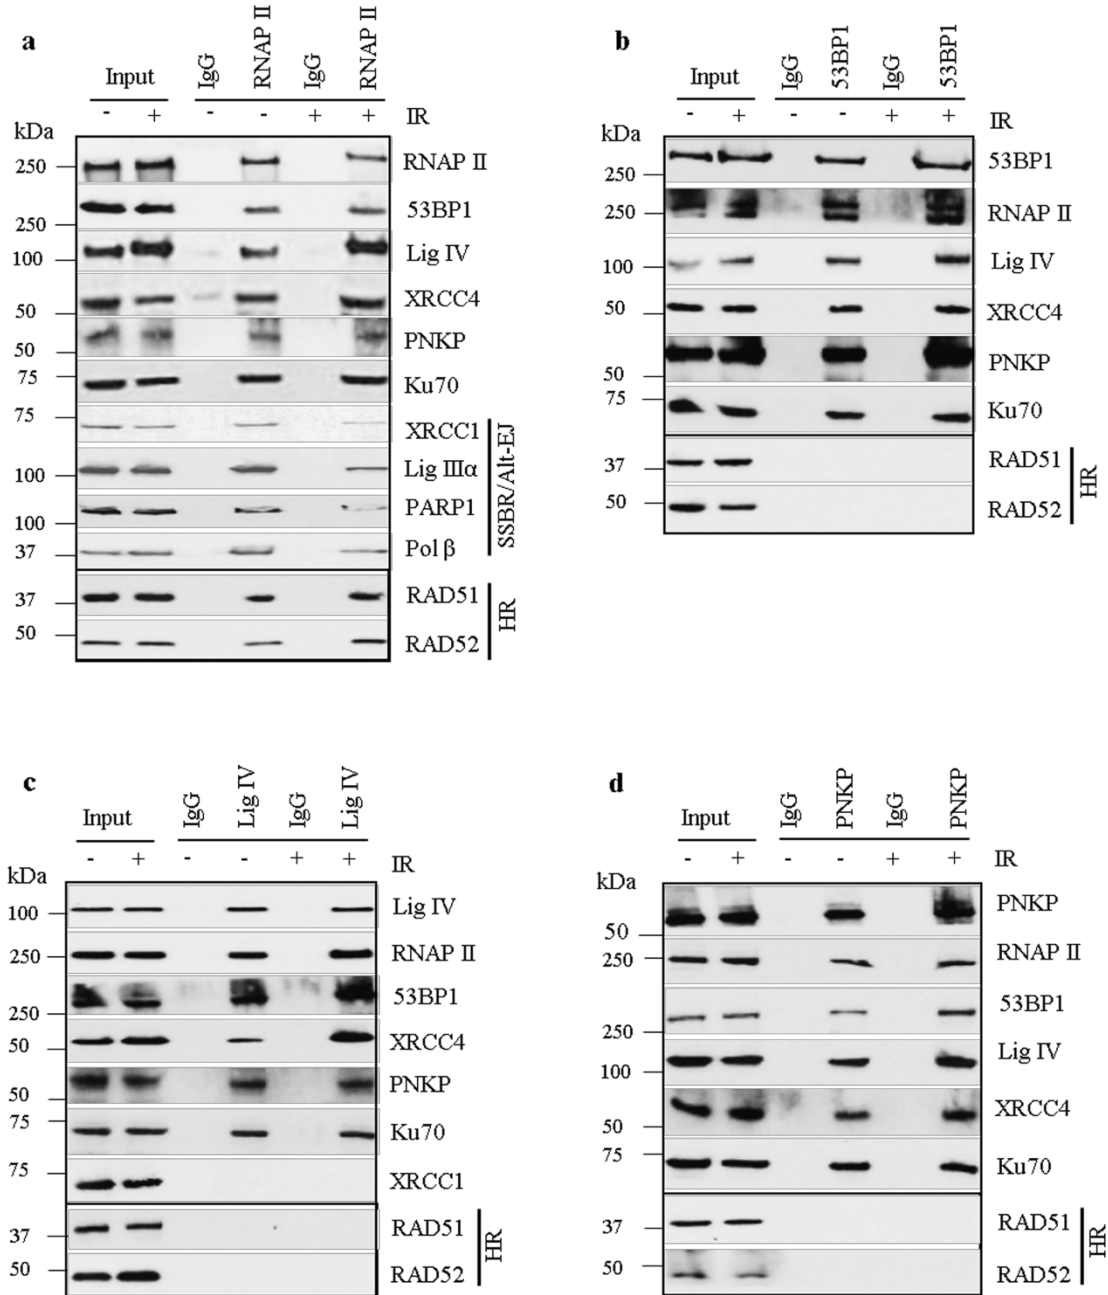

**Supplementary Figure 2: Partial characterization of ionizing radiation-induced DSB repair complexes by co-IP analysis**

NE (benzonase-treated) from HEK293 cells [either mock (-) or IR (+) exposed] were IP'd with **(a)** anti-RNAP II (pSer2, H5 Ab); **(b)** anti-53BP1; **(c)** anti-Lig IV; **(d)** anti-PNKP antibodies (Abs, even lanes) or control IgG (odd lanes) and tested for the presence of associated proteins with specific Abs as indicated to the right of each row. Each experiment was repeated at least three times with separate batches of cells with independent IR exposure, and one representative figure is shown in each case.

Supplementary Figure 3

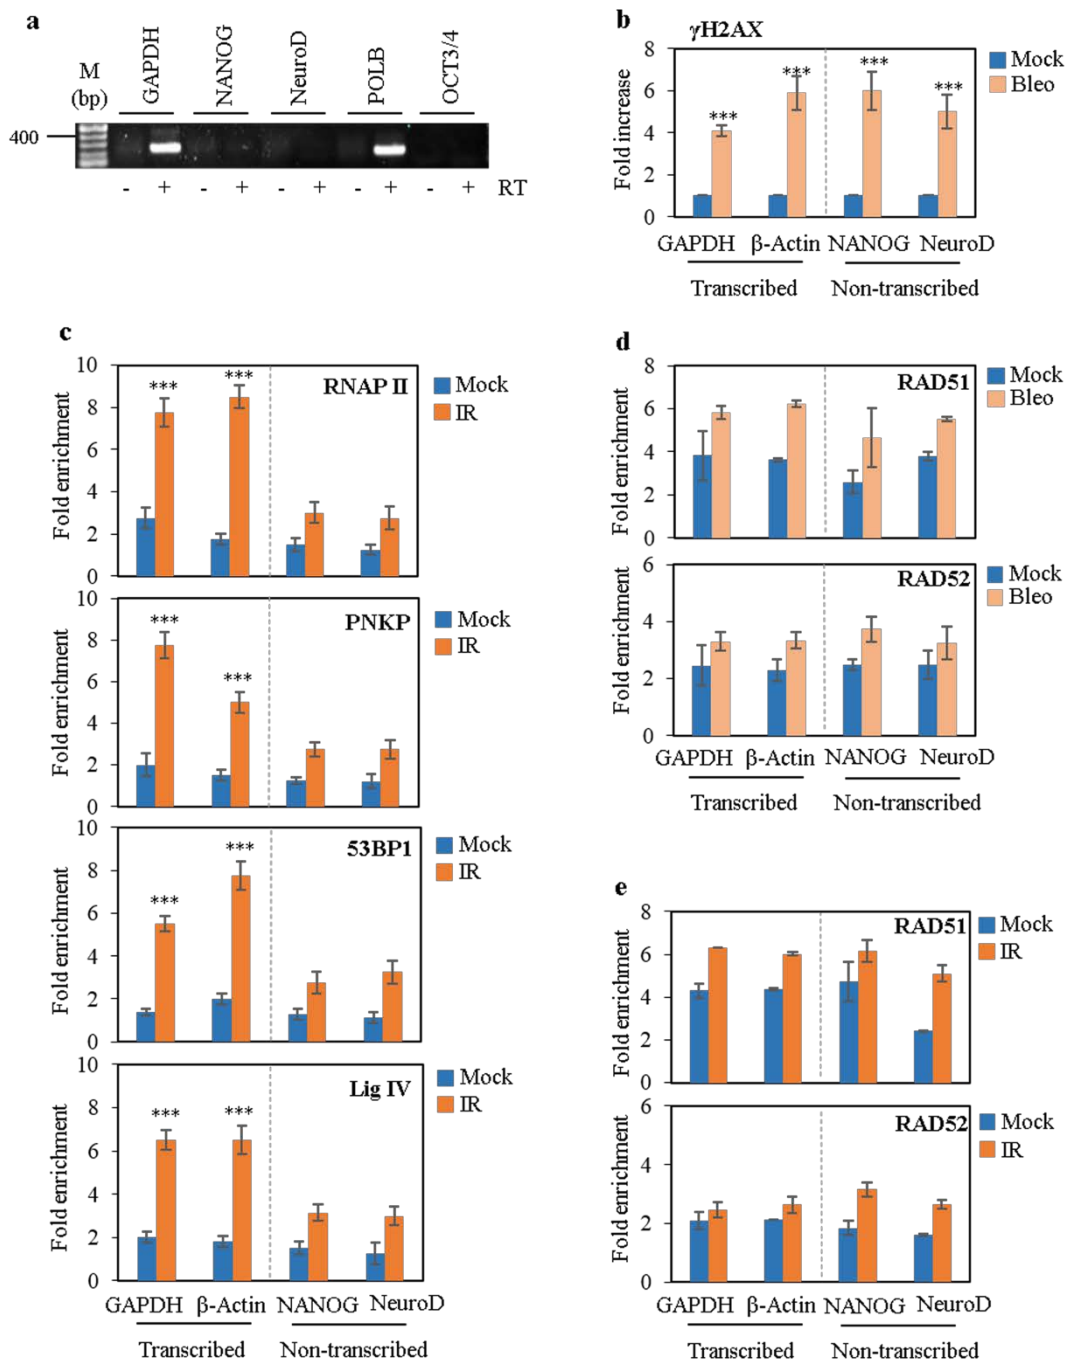

**Supplementary Figure 3: Quantitative ChIP assay to determine the association of C-NHEJ/HR proteins with transcribed vs non-transcribed genes**

(a) Gene expression profile of selected genes used in the studies presented in Figs. 2 and 3.

The shown PCR fragments were obtained from cDNA generated by RT reaction with total RNA of HEK293 cells. As a control for DNA contamination, no RT enzyme was added in all “-RT” samples. All oligos used for amplification of the genes are listed in Supplementary Table 1.

**(b)** HEK293 cells were mock- or Bleo-treated and ChIP was performed with anti-Histone H2A.XS 139ph (ser phos 139 residue) Ab. Binding to the exonic regions of transcribed (GAPDH and  $\beta$ -Actin) vs non-transcribed (NANOG and NeuroD) genes was quantified by qPCR from IP'd DNA. The data are represented as fold increase in normalized percent input (over IgG) with mock samples considered as unity. Error bars represent  $\pm$ SD of the mean (n=3). \*\*\*= $P < 0.005$  represents statistical significance between mock- and Bleo-treated samples. **(c)** HEK293 cells were mock- or IR-exposed and ChIP was performed with specific Abs as indicated. Binding to the exonic regions of transcribed (GAPDH and  $\beta$ -Actin) vs non-transcribed (NANOG and NeuroD) genes was quantified by qPCR from IP'd DNA. The data are represented as fold enrichment of percent input of the sample over IgG. Error bars represent  $\pm$ SD of the mean (n=3). \*\*\*= $P < 0.005$  represents statistical significance within a treatment group between a particular transcribed gene with both non-transcribed genes (NANOG and NeuroD).

ChIP assays were performed with NE from mock/Bleo-treated **(d)** and mock/IR-exposed **(e)** HEK293 cells using anti-RAD51 or -RAD52 Abs and analyzed by qPCRs using specific primers for transcribed and non-transcribed genes. Error bars represent  $\pm$ SD of the mean calculated from three independent experiments.

## Supplementary Figure 4

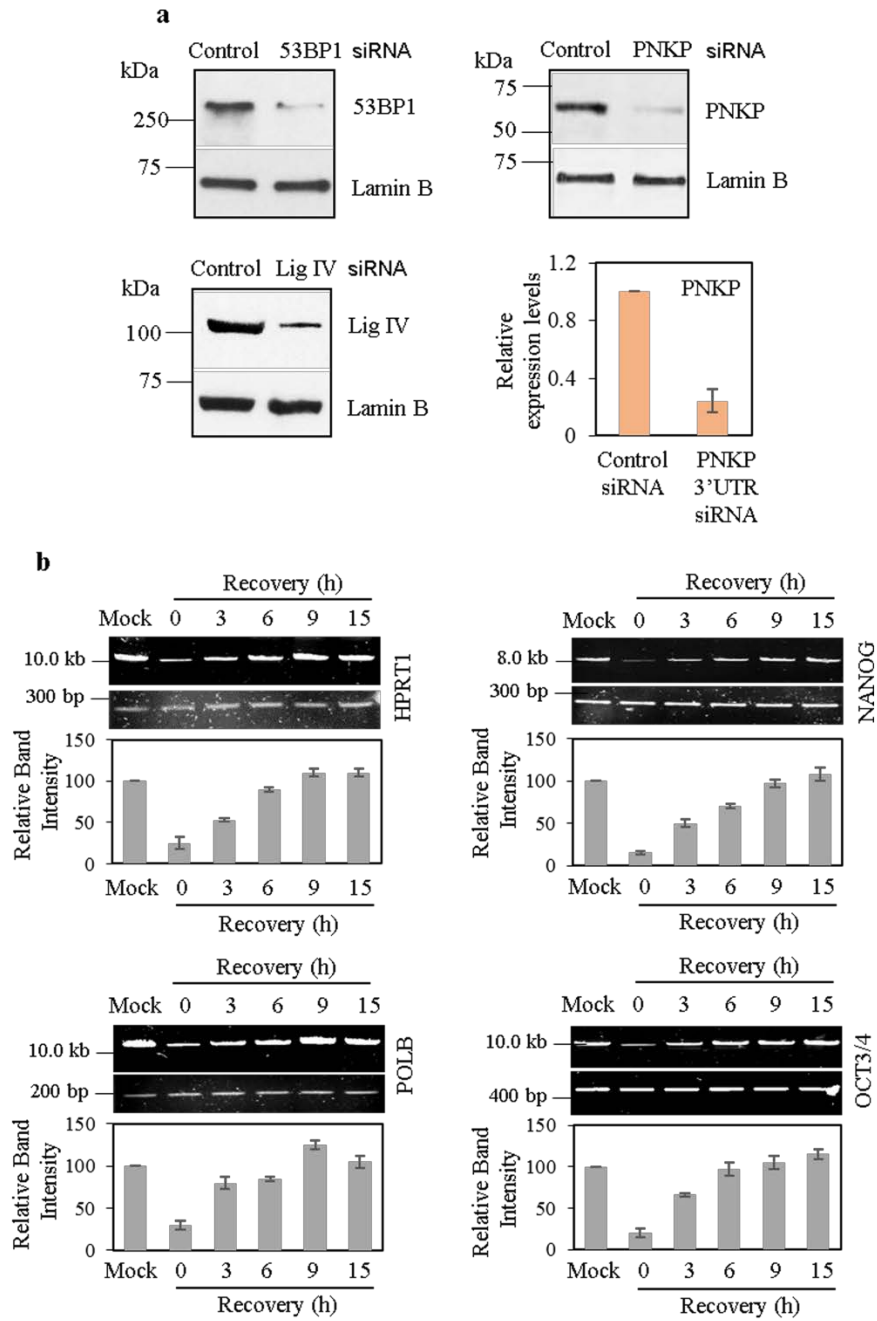

**Supplementary Figure 4: Depletion of C-NHEJ proteins and measurement of the DSB removal rate**

**(a)** Western blot analysis to estimate the level of 53BP1, Lig IV and PNKP in the NEs from HEK293 cells transfected with the specific or control siRNA. Lamin B was used as loading control in each case. qRT-PCR was performed using PNKP 3' UTR-specific oligos to confirm the depletion of endogenous PNKP by 3' UTR-specific siRNA. Normalization was performed with 18S, and data are represented as relative expression level ( $\pm$ SD) with the normalized value for control siRNA-treated samples considered as unity (n=2). **(b)** HEK293 cells were transfected with control siRNA and further mock- or Bleo- treated, kept for recovery for 0, 3, 6, 9 and 15 h after Bleo treatment, and harvested for genomic DNA isolation. Amplification of each large fragment (8-12 kb) was normalized to that of a small fragment (~200-400 bp) of the corresponding transcribed (HPRT1 and POLB) or non-transcribed (NANOG and OCT3/4) genes; the normalized data are represented (in the bar diagram) as the relative band intensity with the control siRNA/mock-treated sample arbitrarily set as 100 (n $\geq$ 3; one representative gel figure is shown). Error bars represent  $\pm$ SD of the mean.



Supplementary Figure 5

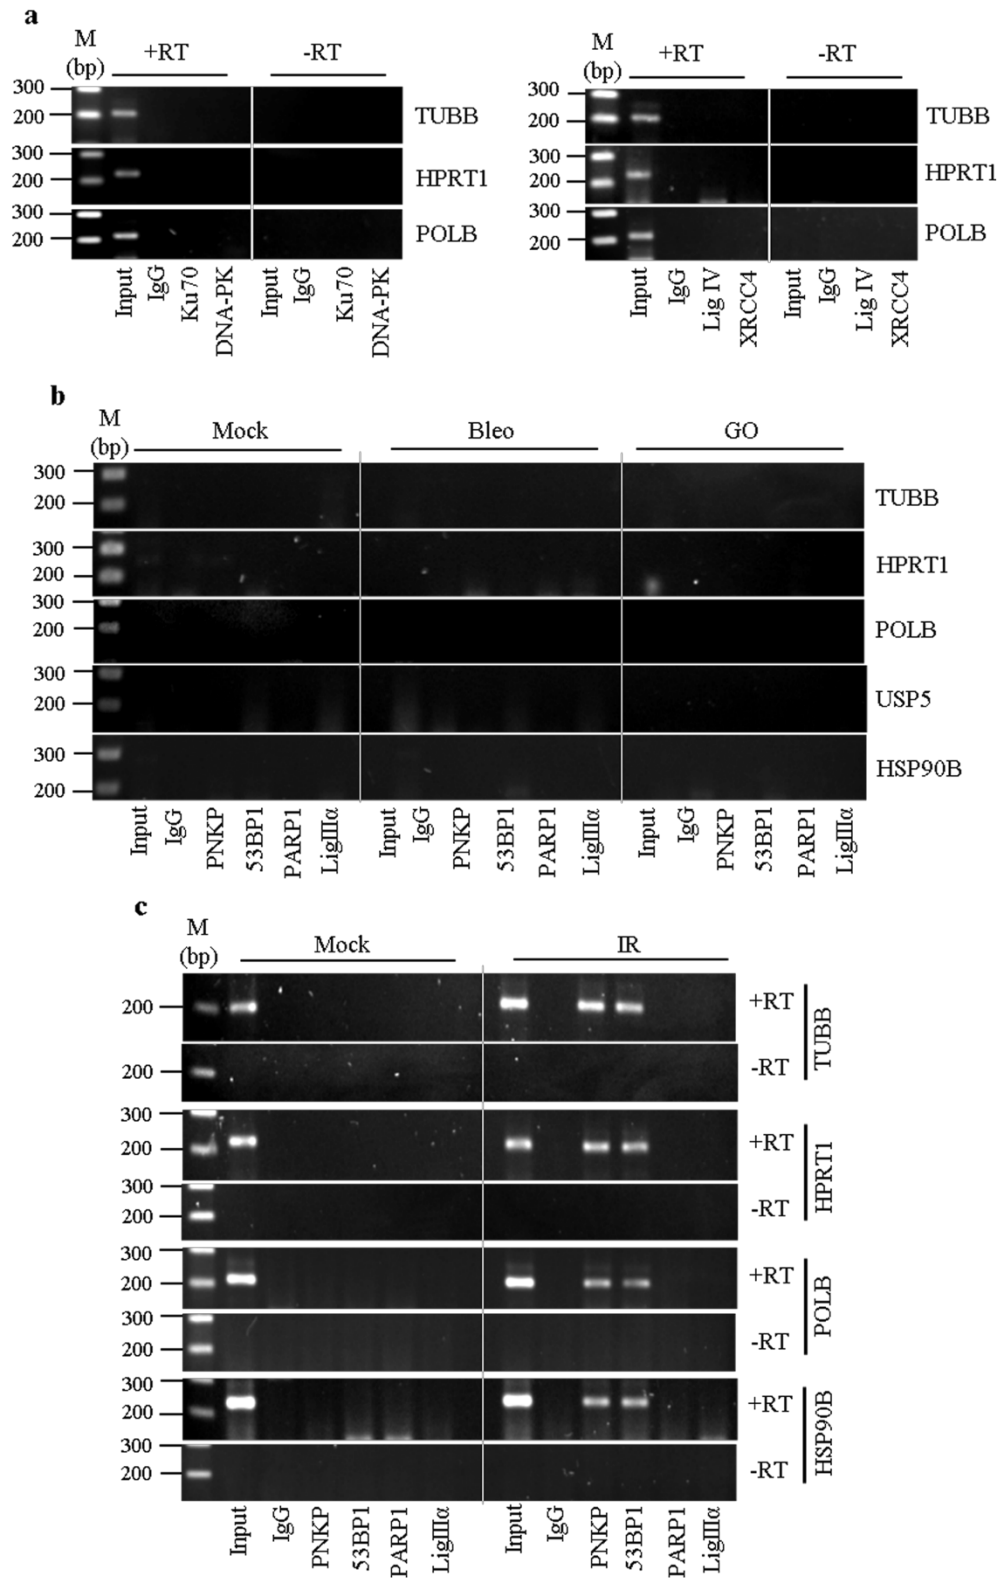

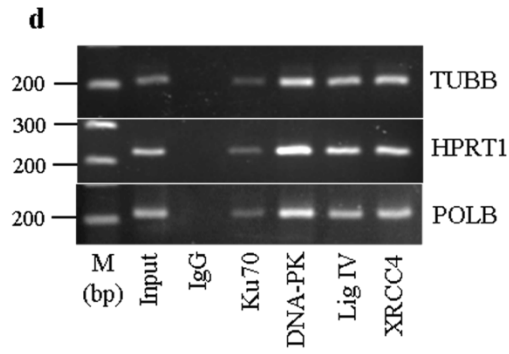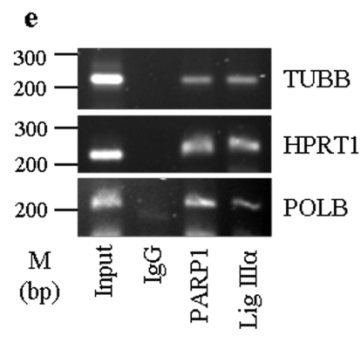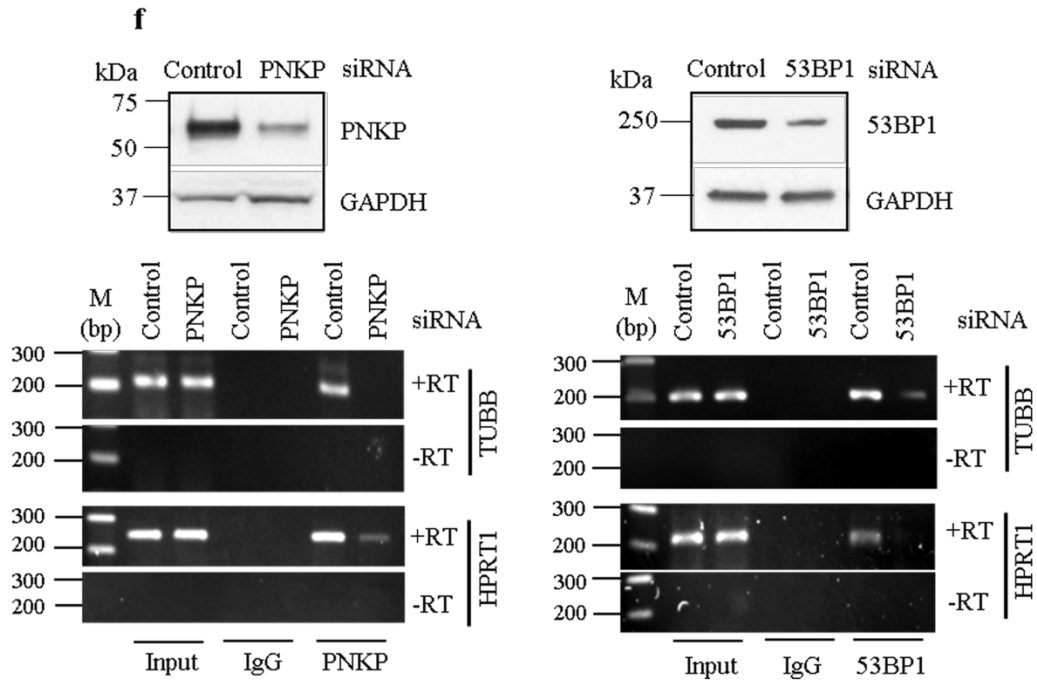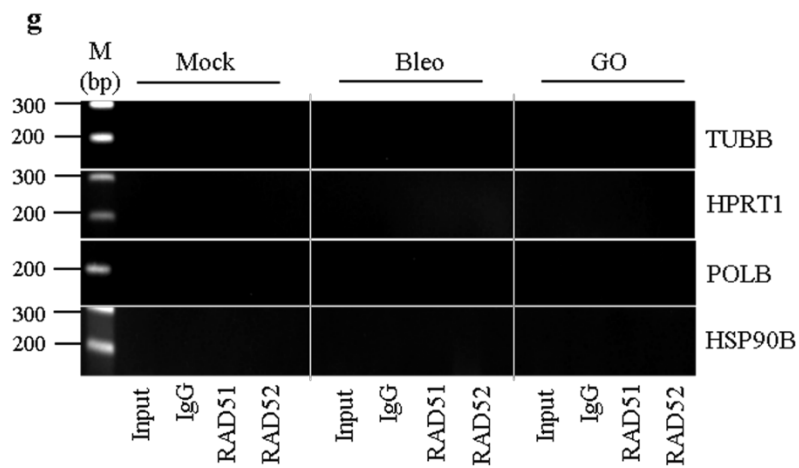

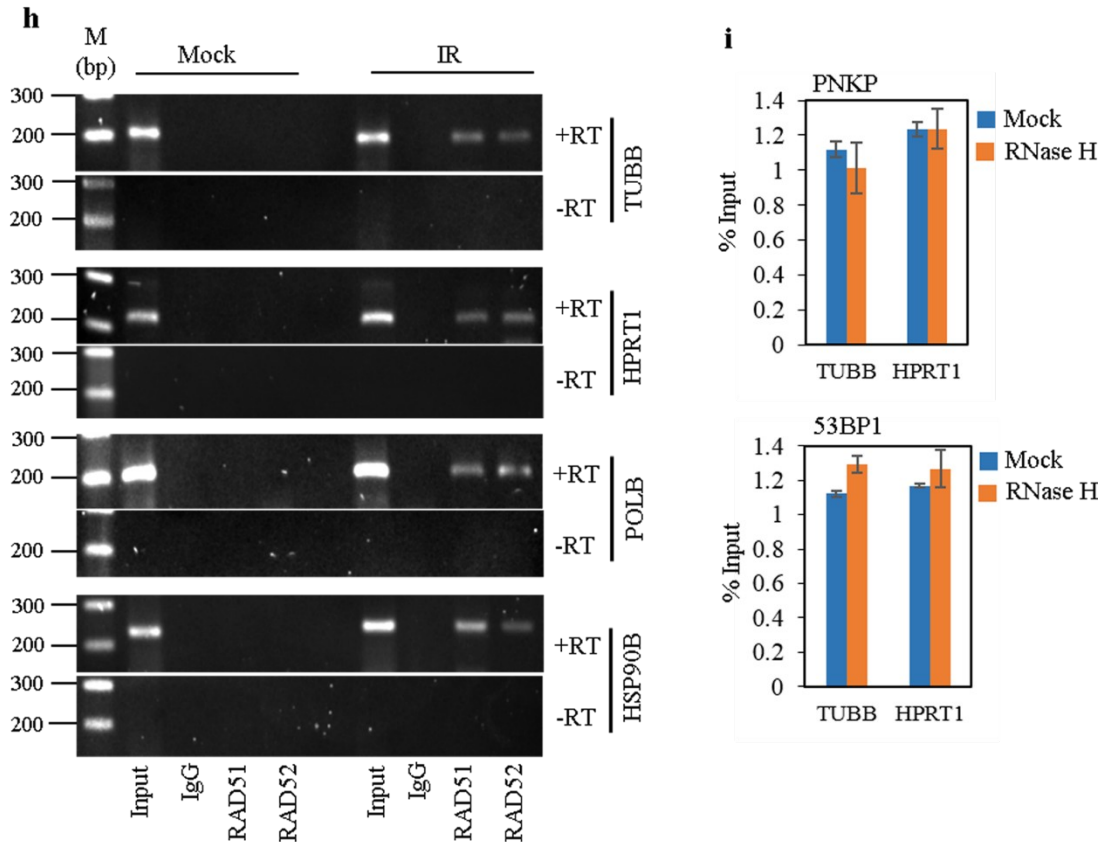

### Supplementary Figure 5: Association of pre-mRNA with the C-NHEJ complex

**(a)** RNA-ChIP assays with Bleo-treated cells using Abs as indicated and analyzed by RT-PCR with intron-specific primers for TUBB, HPRT1 and POLB. **(b)** Control minus RT (-RT) reactions for RNA-ChIP assays performed with NE from mock/Bleo/GO-treated HEK293 cells, using the indicated Abs. RT-PCRs were carried out for TUBB, HPRT1, POLB, USP5 and HSP90B genes using intron-specific primers. **(c)** Similarly, HEK293 cells were exposed with mock/IR and subjected to RNA-ChIP assays, using the indicated Abs, and RT-PCRs were performed with +RT and -RT reactions for 4 genes. DNA-ChIP assays with Bleo-treated HEK293 cells using specific Abs against IgG, Ku70, DNA-PK, XRCC4 **(d)** and IgG, PARP1 and Lig III $\alpha$  **(e)** followed by PCRs using intron-specific primers for TUBB, HPRT1 and POLB. **(f)**, Upper panels, Western blot analysis to estimate the level of PNKP (left) and 53BP1 (right) in cell extracts from HEK293 cells transfected with control or specific target siRNAs. GAPDH was used as a loading control in

cell extracts from HEK293 cells transfected with control or specific target siRNAs. GAPDH was used as a loading control in each case. Lower panels, RNA-ChIP using anti-PNKP (left) and -53BP1 (right) Abs in respective control or depleted cells, followed by RT-PCR analysis using intron-specific primers for TUBB and HPRT1. **(g)** Control minus RT reactions for RNA-ChIP assays performed with NE from mock/Bleo/GO-treated cells, using anti-RAD51 and -RAD52 Abs. RT-PCRs were carried out for TUBB, HPRT1, POLB and HSP90B genes using intron-specific primers. **(h)** HEK293 cells were exposed to mock/IR and subjected to RNA-ChIP assay, using anti-RAD51 or -RAD52 Abs and RT-PCRs were performed for TUBB, HPRT1, POLB and HSP90B. **(i)** Bleo-treated HEK293 cells were mock- or RNase H-treated and subjected to DNA-ChIP assays using anti-PNKP or -53BP1 Abs. Real-time qPCRs were performed using intron-specific primers for TUBB and HPRT1.  $C_t$  values were used to calculate percent input and error bars represent  $\pm$ SD of the mean. In each RNA-ChIP assay, 1% input was collected before IPs. All the experiments were repeated at least three times, and a representative image is shown; M represents a 1 kb DNA ladder.

## Supplementary Figure 6

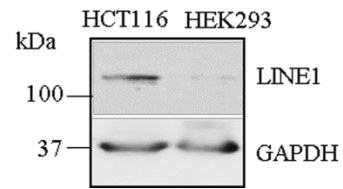

### **Supplementary Figure 6: Estimation of LINE1 (L1TD1)**

Western blot to estimate the level of LINE1 (Ab: GTX32026, GeneTex) in the whole-cell extracts from HEK293 and HCT116 cells. GAPDH was used as a loading control.

# Supplementary Figure 7

**a**

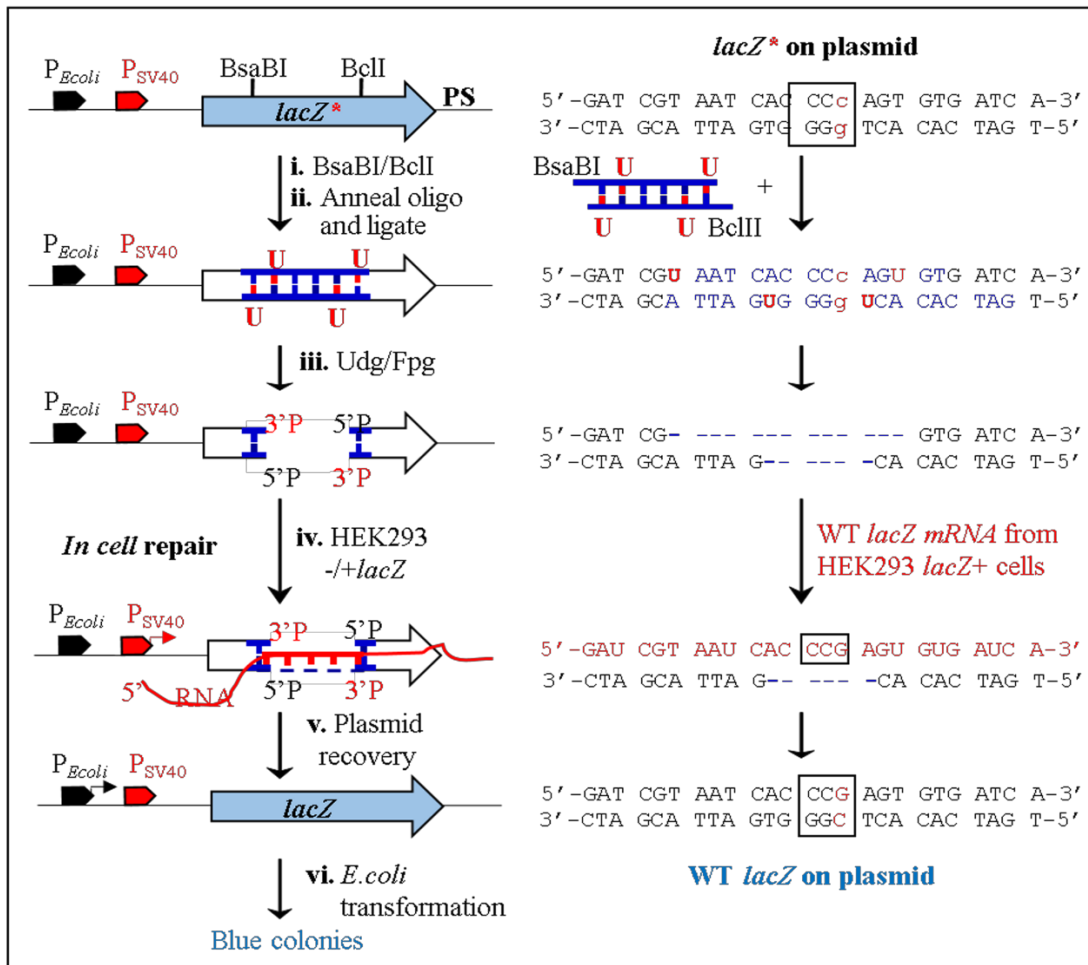

**b**

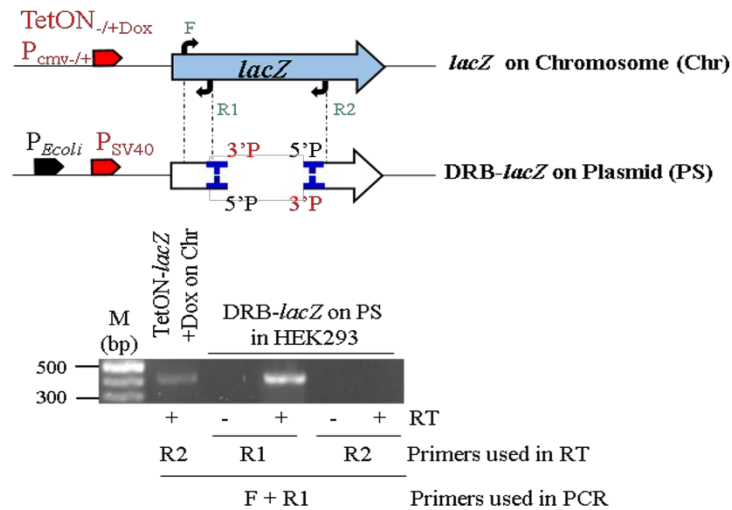

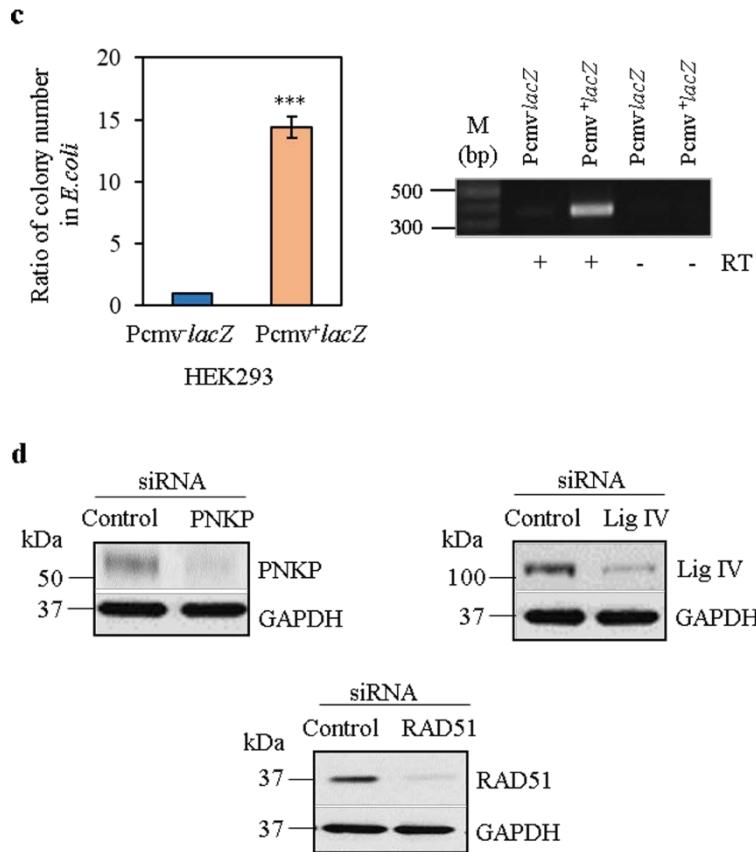

### Supplementary Figure 7: Plasmid-based assay for RNA-templated DSBR

(a) Left panel, a uracil-containing duplex oligo (sequence in the right panel) was introduced within a *lacZ* gene (blue arrow) under the control of both *E. coli* and mammalian promoters using the unique *BsaBI/BclI* sites. Plasmids were treated with *E. coli* Udg/Fpg to create DSBs with non-ligatable 3'-P termini<sup>40</sup>, and several nucleotides were deleted in the process. Linearized plasmids were then transfected into HEK293 cells stably expressing *lacZ* (or corresponding control cells), and allowed to repair for 16h. Plasmids were then recovered from the transfected cells and introduced into *rec<sup>-</sup>lacZ E. coli*; blue colonies were selected and the WT *lacZ* genomic sequence was confirmed by sequencing. Right panel, a silent mutation was introduced into the proline codon (CCG was replaced with CCC, marked in red) within the *lacZ* gene of the

transfected plasmid to distinguish it from the endogenous WT *lacZ*. This figure also shows how the gapped mutant plasmid is repaired using endogenous *lacZ* RNA as a template (in red) to generate WT *lacZ*. **(b)** RT-PCR showing the generation of truncated *lacZ* transcript from the DSB-containing plasmid. A cartoon on the top shows the location and direction of the primers (green) with black arrows within *lacZ*, either to amplify *lacZ* transcribed from chromosomal DNA of HEK293-TetON-*lacZ*+Dox cells (as a positive control) or the DSB-containing plasmid transfected in WT HEK293 cells. Primers R1 (TV286-R) and R2 (TV205-R) were used to synthesize cDNA from total RNA isolated either 12 h post-transfection of the DSB-containing plasmid or from Dox-treated control HEK293-TetON-*lacZ*+ cells. Primers R1 and F (TV209-F) were used in the subsequent PCR. The agarose gel picture with all the PCR products is shown at the bottom. The sequences of the primers are given in Supplementary Table 1. **(c)** Plasmid-based repair assay data are represented as the ratio of the number of *E.coli* blue colonies harboring plasmid DNA that was recovered after 16 h of repair in HEK293-Pcmv<sup>+</sup>*lacZ* vs HEK293-Pcmv<sup>-</sup>*lacZ* stable cell lines (after normalizing for the transfection efficiency and copy number variations of the *lacZ* gene in both cell lines). The number of *E. coli* blue colonies after transformation of the plasmids isolated from HEK293-Pcmv<sup>-</sup>*lacZ* was arbitrarily set as 1. The data in the graph are the average of at least 3 independent experiments with estimated \*\*\*= $P < 0.005$ . RT-PCR, using primer TV205-R to synthesize cDNA from total RNA, showed the expression of *lacZ* in HEK293 (-/+Pcmv) *lacZ* cells (bottom panel). The PCR after RT was done using TV200-F and TV201-R. All primer sequences are given in Supplementary Table 1. **(d)** Western blots showing the levels of PNKP, Lig IV and RAD51 proteins in control vs specific siRNA-treated HEK293-Pcmv<sup>+</sup>*lacZ* cells (see Methods). GAPDH protein was used as a loading control on the SDS-PAGE gel.



Supplementary Figure 8. Uncropped scans of the most important blots

**Figure 1a**

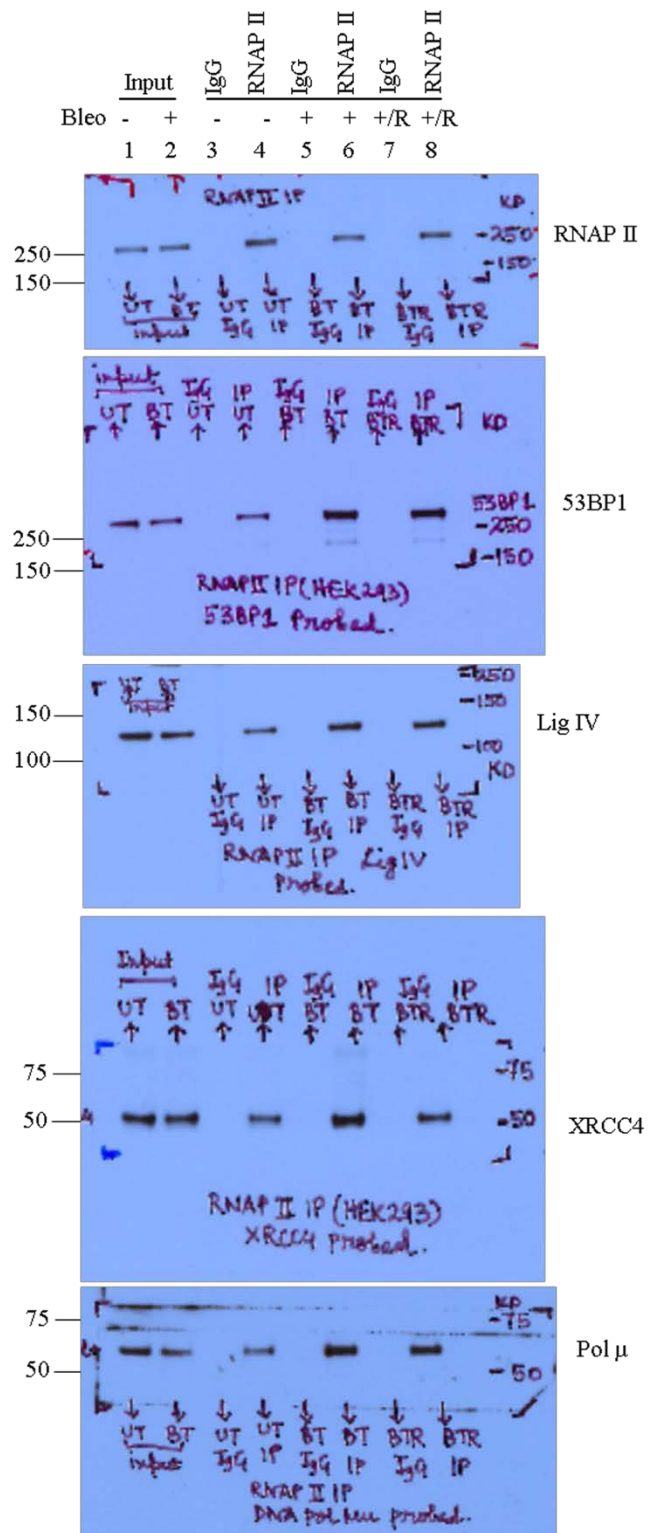

**Figure 1a Cont.**

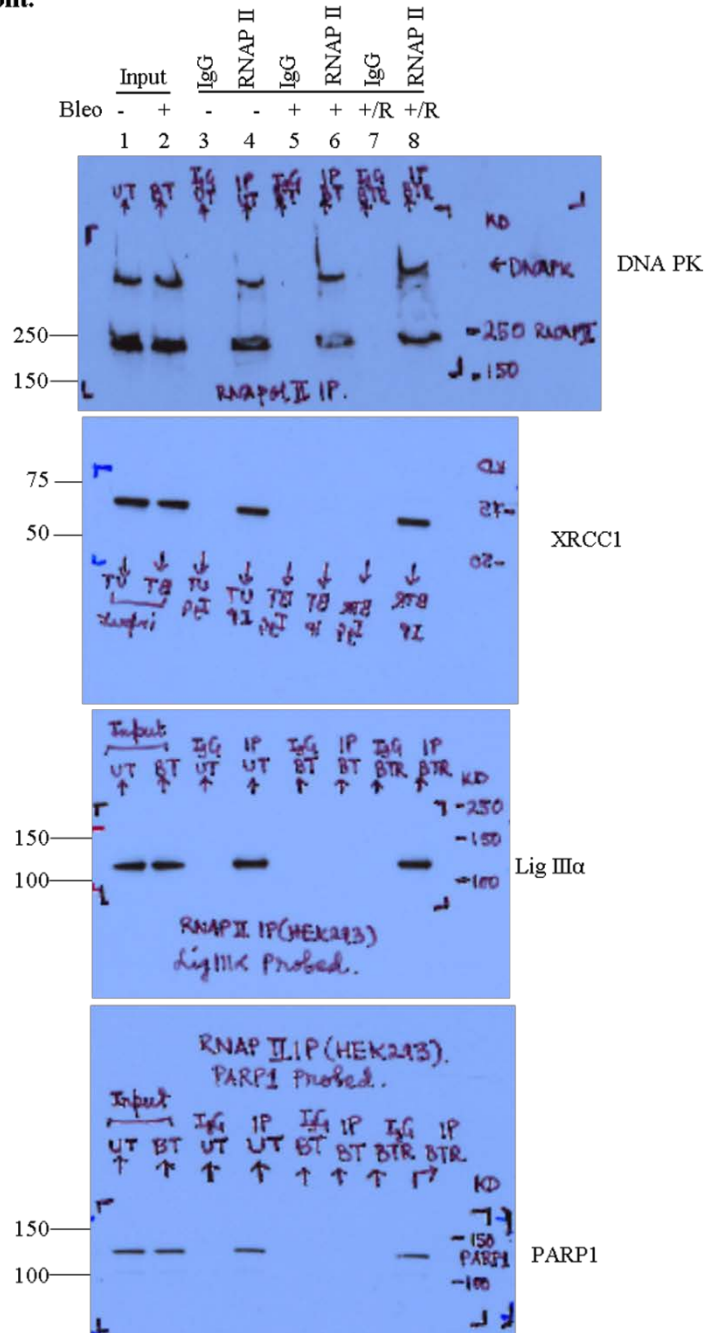

**Figure 1b**

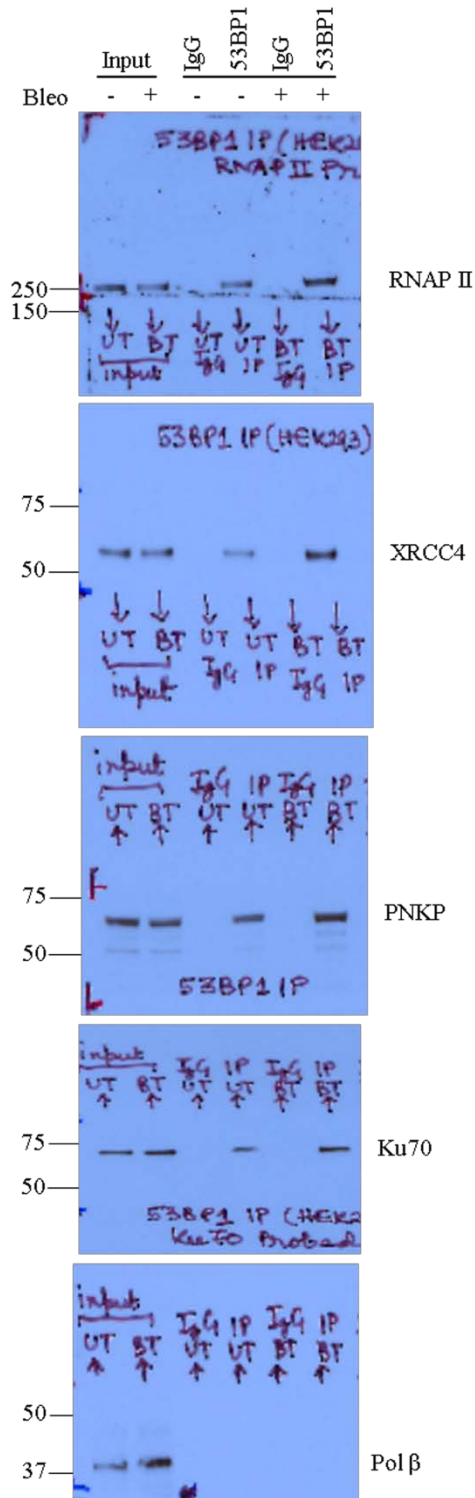

**Figure 1c**

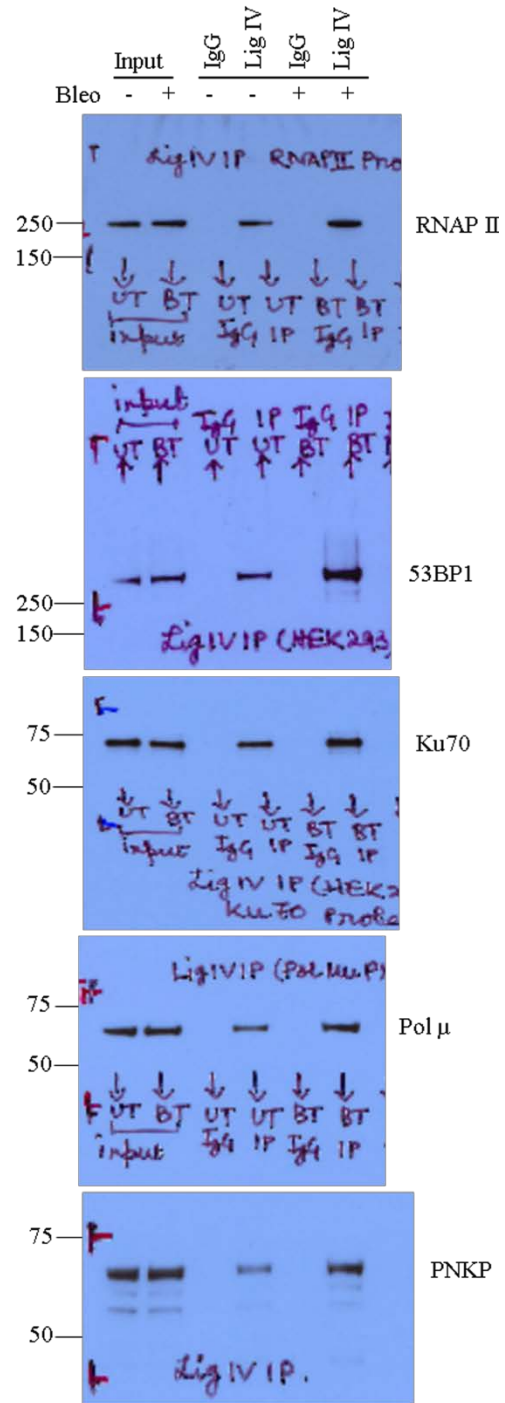

**Figure 1d**

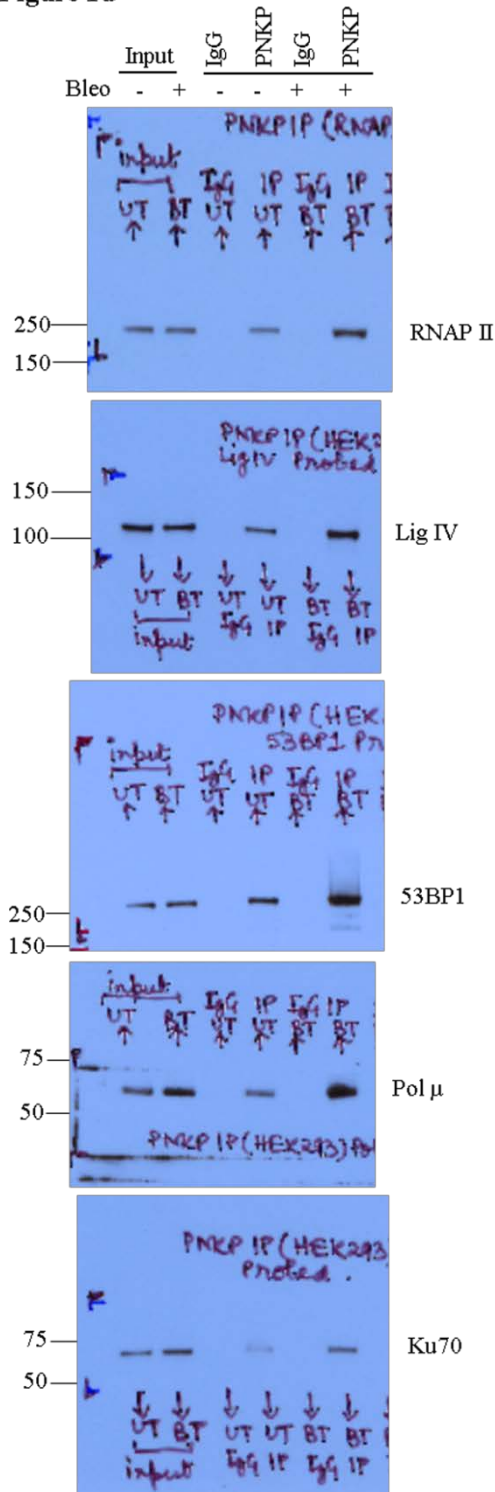

**Figure 1e**

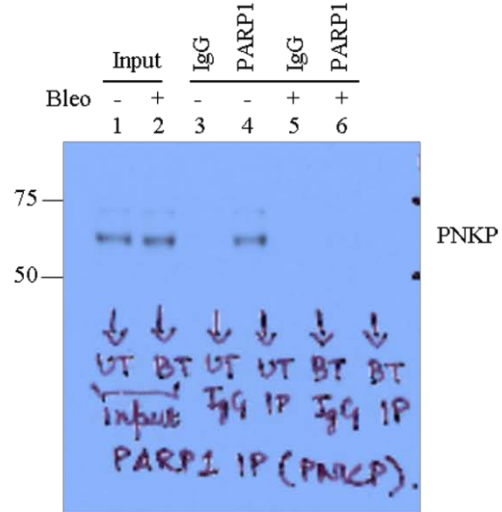

**Figure 1f**

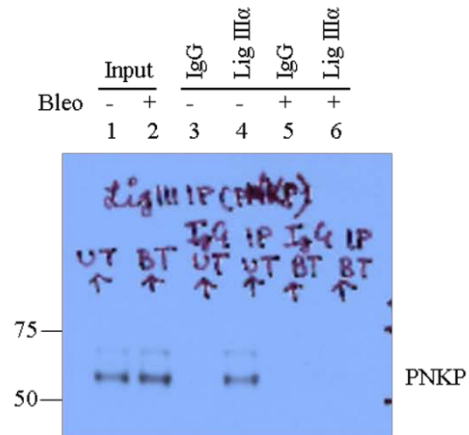

**Supplementary Table 1: Primers used in the study**

| Primers | Gene               | Nucleotide sequence 5' - 3'                                 | Purpose                                                 |
|---------|--------------------|-------------------------------------------------------------|---------------------------------------------------------|
| TV001   | n/a                | GCTTAGCTTGAATCGTATCATG<br>TA(P)                             | RNA/DNA<br>templated total repair<br>(3'P-25 mer oligo) |
| TV031   | n/a                | GGCACGGTCTACACGGCACACG<br>AGTGTACATGATACGATTCCAA<br>GCTAAGC | DNA templated total<br>repair (DNA 51 mer<br>oligo)     |
| TV56-F  | MyoD               | CCCCGACGGCTCTCTCTGCT                                        | qPCR from gDNA<br>(0.281 kb)                            |
| TV57-R  | MyoD               | GTGGTCTTGCGCTTGACGC                                         | qPCR from gDNA<br>(0.281kb)                             |
| TV108-F | PNKP               | CGGTCCAAGCTTGGCACCCAGG<br>ATGGGCGAGGTGGAGGCCCC              | Construction of<br>pTV54 and pTV61                      |
| TV109-R | PNKP               | AGAATAGGATCCGCCCTCGGAG<br>AACTGGCAGTACA                     | Construction of<br>pTV54                                |
| TV110-R | PNKP               | AGAATATCTAGATTACTTGTCAT<br>CGTCGTCCTTGTAGTC                 | Construction of<br>pTV61                                |
| TV140-F | POLB               | AGTGGGCTGGATGTAACCTG                                        | SA-PCR (0.192 kb)                                       |
| TV141-R | POLB               | CCAGTAGATGTGCTGCCAGA                                        | SA-PCR (0.192 kb)                                       |
| TV142-F | HPRT1              | TGGGATTACACGTGTGAACCAACC                                    | LA-qPCR (10.4 kb)                                       |
| TV143-R | HPRT1              | GCTCTACCCTCTCCTTACCGTC<br>C                                 | LA-qPCR (10.4 kb)                                       |
| TV144-F | HPRT1              | TGCTCGAGATGTGATGAAGG                                        | SA-PCR (0.286 kb)                                       |
| TV145-R | HPRT1              | CTGCATTGTTTTGCCAGTGT                                        | SA-PCR (0.286 kb)                                       |
| TV161-F | POLB               | CATGTCACCACTGGACTCTGCAC                                     | LA-qPCR (12.2 kb)                                       |
| TV162-R | POLB               | CCTGGAGTAGGAACAAAATTG<br>CT                                 | LA-qPCR (12.2 kb)                                       |
| TV199-F | <i>E.coli lacZ</i> | GGCGACTTCCAGTTCAACATCA                                      | Sequencing                                              |
| TV200-F | <i>E.coli lacZ</i> | CATTATCCGAACCATCCGCTGTG                                     | PCR, qPCR from<br>gDNA and<br>Sequencing                |
| TV201-R | <i>E.coli lacZ</i> | CTGGTCTTCATCCACGCGCGCG                                      | PCR, qPCR from<br>gDNA and<br>Sequencing                |
| TV205-R | <i>E.coli lacZ</i> | CGCTATGACGGAACAGGTATT                                       | RT-PCR                                                  |
| TV206-R | <i>E.coli lacZ</i> | CCGCATCAGCAAGTGTATCT                                        | PCR from gDNA and<br>Sequencing                         |
| TV209-F | <i>E.coli lacZ</i> | GTGCCGGCTAGCTGGCTGGAGT<br>GCGATCTTCCT                       | Sequencing; RT-PCR                                      |
| TV210-R | <i>E.coli lacZ</i> | TCCTGGGGATCCAGACATGATA<br>AGATACATT                         | Construction of<br>pTV108 and PCR<br>from gDNA          |
| TV213-F | <i>E.coli lacZ</i> | CGTAGCTAGCCAGGCTGGGACA<br>CT                                | Construction of<br>pTV108 and PCR<br>from gDNA          |
| TV214-F | NANOG              | CTCCGGAATGGTAGTCTGAGAA<br>GAA                               | LA-qPCR (8.6 kb)                                        |
| TV215-R | NANOG              | ATTTAGGGCAGGCACAAGATGG                                      | LA-qPCR (8.6 kb)                                        |
| TV218-F | HSP70              | GTCAACATGGTGAAATCCCGTC<br>TCTACTA                           | LA-qPCR (8.9 kb)                                        |

|                     |                    |                                                                                                                          |                                                                               |
|---------------------|--------------------|--------------------------------------------------------------------------------------------------------------------------|-------------------------------------------------------------------------------|
| TV219-R             | HSP70              | TAGGAAATGCAAAGTCTTGAAG<br>CTCCAAA                                                                                        | LA-qPCR (8.9 kb)                                                              |
| TV232-F             | OCT3/4             | TCTGTGGCCTCACCTATGA                                                                                                      | LA-qPCR (10.1 kb)                                                             |
| TV233-R             | OCT3/4             | CAGACCTGTGGCAGGTATTGAA                                                                                                   | LA-qPCR (10.1 kb)                                                             |
| TV247-F             | <i>E.coli lacZ</i> | CAGGCTGGGAGCGGCCGCATGA<br>GCGAAAAATACATCG                                                                                | Construction of<br>pTV119                                                     |
| TV248-R             | <i>E.coli lacZ</i> | CCTGGATCCTTATTATTATTTTT<br>GACACCAGACCAACT                                                                               | Construction of<br>pTV119                                                     |
| TV263-F             | <i>E.coli lacZ</i> | (P)UAATCACCCcAGUGT                                                                                                       | DSBR plasmid assay                                                            |
| TV264-R             | <i>E.coli lacZ</i> | (P)GATCACACUGGGGUGATTA                                                                                                   | DSBR plasmid assay                                                            |
| TV265-F             | <i>E.coli lacZ</i> | (P)TAATCACCCcAGTGT                                                                                                       | Construction of<br>pTV123                                                     |
| TV266-R             | <i>E.coli lacZ</i> | (P)GATCACACTGGGGTGATTA                                                                                                   | Construction of<br>pTV123                                                     |
| TV267               | n/a                | (P)CGTGTGCCGTGTAGACCGTGC<br>C                                                                                            | RNA/DNA<br>templated total repair<br>(5'P-22 mer oligo)                       |
| TV286-R             | <i>E.coli lacZ</i> | GCCACATATCCTGATCTTCCAGA<br>T                                                                                             | Sequencing; RT-PCR                                                            |
| TV287-F             | <i>E.coli lacZ</i> | CTCTGGATGTGCTCCACCAGGT<br>AAACAG                                                                                         | Sequencing                                                                    |
| TV07 RPmix          | NANOG              | RealTimePrimers.com                                                                                                      | SA-PCR (0.244 kb),<br>ChIP qPCR and<br>Checking<br>transcription in<br>HEK293 |
| TV08 RPmix          | HSP70              | RealTimePrimers.com                                                                                                      | SA-PCR (0.203 kb)                                                             |
| TV10 RPmix          | OCT3/4             | RealTimePrimers.com                                                                                                      | SA-PCR (0.455 kb)<br>and Checking<br>transcription in<br>HEK293               |
| TV17 RPmix          | POLB               | RealTimePrimers.com                                                                                                      | Checking<br>transcription in<br>HEK293                                        |
| TV19 RPmix          | GAPDH              | RealTimePrimers.com                                                                                                      | Checking<br>transcription in<br>HEK293; ChIP<br>qPCR                          |
| TV21 RPmix          | NeuroD             | RealTimePrimers.com                                                                                                      | Checking<br>transcription in<br>HEK293 and qChIP<br>Assay                     |
| TV20 RPmix          | $\beta$ -Actin     | RealTimePrimers.com                                                                                                      | ChIP qPCR                                                                     |
| RNA oligo 51<br>Mer | n/a                | <b>GGCA</b> rCrGrUrCrUrArCrArCrGrG<br>rCrArCrArCrGrArGrUrGrUrArCrAr<br>UrGrArUrArCrGrArUrUrCrCrArArG<br>rCr <b>UAAGC</b> | RNA templated total<br>repair (51 mer oligo)<br>(DNA bases are in<br>bold)    |
| TUBB-In2-For        | TUBB               | TCCCTGTCTCCCACTTATCTG                                                                                                    | (RNA/DNA)-ChIP<br>PCR/qPCR                                                    |
| TUBB-In2-Rev        | TUBB               | TCTGGCAGAAGGGAAGGTTT                                                                                                     | (RNA/DNA)-ChIP<br>PCR/qPCR                                                    |
| HPRT1-In2-For       | HPRT1              | TGCCAGTATGGGTGGGAGAA                                                                                                     | (RNA/DNA)-ChIP<br>PCR/qPCR                                                    |
| HPRT1-In2-Rev       | HPRT1              | AGGGTAAAAACCCAGGCATGA                                                                                                    | (RNA/DNA)-                                                                    |

|                |                      |                         |                                   |
|----------------|----------------------|-------------------------|-----------------------------------|
|                |                      |                         | ChIPPCR/qPCR                      |
| PolB-int1-For  | POLB                 | CCTGCCCTTAGCCCTCTTTT    | (RNA/DNA)-ChIP<br>PCR/qPCR        |
| PolB-int1-Rev  | POLB                 | AAGGAGGGAGCACAATCAGC    | (RNA/DNA)-ChIP<br>PCR/qPCR        |
| USP5-In2-For   | USP5                 | CCCTTTCTACCAAGCCTGT     | RNA-ChIP<br>PCR/qPCR              |
| USP5-In2-Rev   | USP5                 | CCCTTGACAGAAGGGACTT     | RNA-ChIP<br>PCR/qPCR              |
| HSP90B-In2-For | HSP90B               | ACAGAATGTGCCACAGCTT     | RNA-ChIP<br>PCR/qPCR              |
| HSP90B-In2-Rev | HSP90B               | CGAAGGCAGGGGAAGGTAAA    | RNA-ChIP<br>PCR/qPCR              |
| PNKP3UTR FP    | PNKP<br>(endogenous) | GAGATCCCGTTCCGGCTATG    | PNKP 3UTR specific<br>qRT-PCR     |
| PNKP3UTR RP    | PNKP<br>(endogenous) | CAGCGTTTATTGTGGAGGGG    | PNKP 3'UTR<br>specific qRT-PCR    |
| HSP 70 FP      | HSP70                | CTGTGCGGCTGCAGGCACCGGC  | DNA ChIP qPCR                     |
| HSP 70 RP      | HSP70                | TGGTGCGGTTGCCCTGGTCGTT  | DNA ChIP qPCR                     |
| HSP89 FP       | HSP89                | CCTCTGTAGACGTCTGCAAGGT  | DNA ChIP qPCR                     |
| HSP89 RP       | HSP89                | ATCCGATTCTGGGTTAATAAGTG | DNA ChIP qPCR                     |
| 18S Primer mix | 18S                  | RealTimePrimers.com     | Endogenous control<br>in qRT-PCR. |

**Supplementary Table 2: Number of blue colonies obtained in all *lacZ* plasmid-based assays**

| Mammalian cells from which the repaired <i>lacZ</i> -containing plasmid was isolated               | Number of blue colonies in <i>E.coli</i> * |
|----------------------------------------------------------------------------------------------------|--------------------------------------------|
| none**                                                                                             | 0                                          |
| HEK293                                                                                             | 0                                          |
| HEK293-TetON <i>lacZ</i> - Dox<br>+ Dox                                                            | 5 ±0.6<br>144 ±6.5                         |
| HEK293- <i>lacZ</i> Pcmv <sup>-</sup><br>Pcmv <sup>+</sup>                                         | 8 ±1<br>155 ±10.4                          |
| HEK293-Pcmv <sup>+</sup> <i>lacZ</i><br>Control siRNA<br>PNKP siRNA<br>Lig IV siRNA<br>RAD51 siRNA | 241 ±13<br>9 ±2.5<br>23 ±5<br>218 ±9.8     |

\* Results represent the average number of colonies ( $\pm$  SD) obtained with plasmid DNA recovered from 3 independent mammalian cell transfections of the DSB-containing plasmid.

\*\* Udg/Fpg digested DSB-containing plasmid was tested for colony formation in *E.coli* prior to transfection into mammalian cells.
